**Title: Implementation and evaluation of a novel real-time multiplex assay for SARS-CoV-2: In-field learnings from a clinical microbiology laboratory**

**Author names:** Eloise Williams<sup>1</sup>, Katherine Bond<sup>1</sup>, Brian Chong<sup>2</sup>, Dawn Giltrap<sup>1</sup>, Malcolm Eaton<sup>1</sup>, Peter Kyriakou<sup>1</sup>, Peter Calvert<sup>1</sup>, Bowen Zhang<sup>1</sup>, Mahendra Siwan<sup>1</sup>, Benjamin Howden<sup>3</sup>, Julian Druce<sup>2</sup>, Mike Catton<sup>2</sup>, Deborah A Williamson<sup>1,2,3</sup>

**Author affiliations:**

<sup>1</sup> *Department of Microbiology, Royal Melbourne Hospital, Melbourne, Victoria, Australia*

<sup>2</sup> *Victorian Infectious Diseases Reference Laboratory, The Peter Doherty Institute for Infection and Immunity, Melbourne, Australia*

<sup>3</sup> *Department of Microbiology and Immunology, The University of Melbourne at The Peter Doherty Institute for Infection and Immunity, Melbourne, Australia*

1 **ABSTRACT**

2 The unprecedented scale of testing required to effectively control the coronavirus  
3 disease (COVID-19) pandemic has necessitated urgent implementation of rapid  
4 testing in clinical microbiology laboratories. To date, there are limited data available  
5 on the analytical performance of emerging commercially available assays for severe  
6 acute respiratory syndrome coronavirus 2 (SARS-CoV-2) and integration of these  
7 assays into laboratory workflows. Here, we performed a prospective validation study  
8 of a commercially available assay, the AusDiagnostics Coronavirus Typing (8-well)  
9 assay. Respiratory tract samples for SARS-CoV-2 testing were collected between 1<sup>st</sup>  
10 March and 25<sup>th</sup> March 2020. All positive samples and a random subset of negative  
11 samples were sent to a reference laboratory for confirmation. In total, 2,673 samples  
12 were analyzed using the Coronavirus Typing assay. The predominant sample type  
13 was a combined nasopharyngeal/throat swab (2,640/2,673; 98.8%). Fifty-four  
14 patients were positive for SARS-CoV-2 (0.02%) using the Coronavirus Typing assay;  
15 53/54 (98.1%) positive results and 621/621 (100%) negative results were concordant  
16 with the reference laboratory. Compared to the reference standard, sensitivity of the  
17 Coronavirus Typing assay for SARS-CoV-2 was 100% [95% CI 93.2%-100%],  
18 specificity 99.8% [95% CI 99.1%-100%], positive predictive value 98.1% (95% CI  
19 90.2%-99.7%) and negative predictive value 100% [95% CI 99.4%-100%]. In many  
20 countries, standard regulatory requirements for the introduction of new assays have  
21 been replaced by emergency authorizations and it is critical that laboratories share  
22 their post-market validation experiences, as the consequences of widespread  
23 introduction of a sub-optimal assay for SARS-CoV-2 are profound. Here, we share  
24 our in-field experience, and encourage other laboratories to follow suit.

25

## 26 **1. INTRODUCTION**

27 The coronavirus disease (COVID-19) pandemic caused by severe acute respiratory  
28 syndrome coronavirus 2 (SARS-CoV-2) is a global public health emergency on an  
29 unprecedented scale. One of the fundamental pillars in the prevention and control of  
30 COVID-19 is timely, scalable and accurate diagnostic testing. Initial laboratory  
31 responses included early characterization and release of the viral whole genome  
32 sequence by Chinese investigators in early January 2020 <sup>1</sup>, which enabled rapid  
33 development of real-time reverse-transcription polymerase chain reaction (RT-PCR)  
34 workflows for detection of SARS-CoV-2. In many settings, testing was initially  
35 conducted using in-house RT-PCR assays in public health laboratories <sup>2-6</sup>.  
36 However, the sheer scale of testing required to effectively control this pandemic  
37 means there is an urgent need for rapid, sensitive and specific testing in routine  
38 clinical microbiology laboratories beyond the public health laboratory setting.

39

40 In many countries, the need for rapid introduction of SARS-CoV-2 testing has  
41 resulted in rapid changes or extensions to existing regulatory frameworks. For  
42 example, in the United States (US) the US Food and Drug Association (FDA) began  
43 allowing SARS-CoV-2 testing using laboratory-developed tests without prior agency  
44 approval on 29<sup>th</sup> February 2020, as long as laboratories submitted an Emergency  
45 Use Authorization application within 15 days <sup>7</sup>. In Australia, the Commonwealth  
46 Department of Health exempted medical devices related to the diagnosis,  
47 confirmatory testing, prevention, monitoring, treatment or alleviation of COVID-19  
48 infection from the requirement for devices to be included in the Therapeutic Goods  
49 Administration (TGA) Australian Register of Therapeutic Goods (ARTG) ahead of  
50 use in Australia on 31<sup>st</sup> January, 2020 for laboratories within the Public Health

51 Laboratory Network of Australasia (PHLN) <sup>8</sup> and expanded these exemptions to  
52 include all accredited pathology laboratories on 22<sup>nd</sup> March 2020 <sup>9</sup>.

53

54 A range of commercially available RT-PCR assays are now approved for use in  
55 diagnostic laboratories in Australia <sup>10</sup>, although to date, there are little published data  
56 on the performance characteristics and implementation of these assays in diagnostic  
57 microbiology workflows <sup>11</sup>. Here, we describe our initial experience using a  
58 commercially-available multiplex two-step nested tandem RT-PCR assay for the  
59 detection of coronaviruses that infect humans, including SARS-CoV-2. We  
60 demonstrate high sensitivity and specificity for this assay, and describe rapid  
61 upscaling and integration into our laboratory workflow.

62

## 63 **METHODS**

### 64 ***Study setting, testing timeline and patient populations***

65 This study was conducted in the Department of Microbiology, Royal Melbourne  
66 Hospital (RMH). RMH is an academic teaching hospital located in central Melbourne,  
67 Victoria, Australia, that has approximately 1,400 beds across hospital and  
68 community settings. On 25<sup>th</sup> January 2020, a dedicated screening clinic for patients  
69 with suspected COVID-19 was implemented at RMH <sup>12</sup>, and on 11<sup>th</sup> March 2020 a  
70 separate clinic was established at RMH for healthcare workers with suspected  
71 COVID-19. From 23<sup>rd</sup> January to 13<sup>th</sup> March 2020, diagnostic testing of RMH patients  
72 for SARS-CoV-2 was performed at the Victorian Infectious Diseases Reference  
73 Laboratory (VIDRL). On 3<sup>rd</sup> March 2020, testing was implemented in the RMH  
74 laboratory using the Coronavirus Typing (8-well) panel (AusDiagnostics, Mascot,  
75 Australia).

76

77 ***Patient samples***

78 Study samples were collected as part of routine clinical care between 1<sup>st</sup> March 2020  
79 and 25<sup>th</sup> March 2020. Samples comprised combined nasopharyngeal and throat  
80 swabs collected in universal transport media (Copan Diagnostics, Murrieta, USA) or  
81 Liquid Amies transport media (Copan Diagnostics, Murrieta, USA), sputum, tracheal  
82 aspirates, bronchoalveolar lavage and bronchial washings. Victorian Department of  
83 Health guidelines during this period limited testing to patients who met at least one  
84 clinical (fever or acute respiratory infection) and one epidemiological criteria for  
85 COVID-19 (international travel with onset of symptoms within 14 days of return;  
86 close contact of confirmed COVID-19 case with onset of symptoms within 14 days of  
87 last contact; healthcare or residential aged care workers; aged and residential care  
88 residents; patients who are Aboriginal and Torres Strait Islander); or patients  
89 admitted to hospital with acute respiratory tract infection and fever <sup>13</sup>.

90

91 ***Diagnostic testing***

92 RNA was extracted from 200uL of clinical samples using either the viral RNA mini kit  
93 (QIAGEN, Hilden, Germany) on the EZ1 Advanced system (QIAGEN, Hilden,  
94 Germany) or the MT-PREP Extractor System (AusDiagnostics, Mascot, Australia).  
95 On both platforms, RNA was eluted in 60uL. Extracted RNA was subsequently  
96 tested using the Coronavirus Typing assay. This is a two-step, hemi-nested  
97 multiplex tandem PCR, with seven coronavirus RNA targets (Table 1) plus a  
98 proprietary artificial sequence as an internal control. Currently, it is intended for use  
99 as a research use only (RUO) assay, meaning that it can be used for SARS-CoV-2  
100 testing as long as the testing laboratory is able to provide robust validation data. The

101 High-Plex 24 system (AusDiagnostics, Mascot, Australia) was used to perform the  
102 two-step real-time RT-PCR. In each run, the following controls were used: (i) a  
103 negative control comprising PCR grade sterile water; (ii) a proprietary artificial target  
104 sequence used as an internal control to monitor sample inhibition, and (iii) an  
105 external positive control, which initially comprised SARS-2-CoV complementary DNA  
106 (cDNA), pending the availability of gamma-irradiated SARS-CoV-2 in mid-March.

107

108 In keeping with national guidelines regarding the validation of new diagnostic assays  
109 for SARS-CoV-2<sup>14, 15</sup> and in order to generate sufficient validation data, all samples  
110 were initially tested in parallel with Victoria's virology reference laboratory, VIDRL. At  
111 the reference laboratory, testing was first conducted using an in-house assay for the  
112 SARS-CoV-2 RdRp gene<sup>16</sup>. If positive, subsequent testing for the SARS-CoV-2 E  
113 gene was conducted, using previously published primers<sup>2</sup>. All samples that tested  
114 positive for SARS-CoV-2 using the Coronavirus Typing assay were sent to the  
115 reference laboratory for confirmatory testing. Further, a subset of samples that  
116 tested negative on the Coronavirus Typing assay were also tested at the reference  
117 laboratory in order to provide additional specificity data. Prior to commencement of  
118 clinical testing the reference laboratory also provided a blinded quality assessment  
119 panel containing a dilution series of samples of standard culture medium spiked in  
120 duplicate with gamma-irradiated culture supernatants of a SARS-CoV-2 isolate,  
121 described previously<sup>16</sup>.

122

123 Samples that had a negative result on the Coronavirus Typing assay and the VIDRL  
124 RdRP assay were considered a true negative result. Samples that had a positive  
125 result for SARS-CoV-2 on the Coronavirus Typing assay were tested on both the

126 RdRP and E gene assays at the reference laboratory. Two concordant positive  
127 results between the 3 assays were considered a true positive result. Samples with a  
128 single positive assay result were considered discrepant.

129

### 130 ***Statistical analyses***

131 Sensitivity, specificity, positive predictive value and negative predictive value were  
132 reported with 95% confidence intervals. Spearman's rank correlation was used to  
133 examine the association between viral concentration and days from symptom onset.  
134 All statistical analyses were performed using R (version 3.53). A p value  $\leq 0.05$  was  
135 considered statistically significant.

136

## 137 **RESULTS**

### 138 ***Characteristics of the study population and diagnostic testing results***

139 Over the study period, a total of 2,673 patient samples were analyzed using the  
140 Coronavirus Typing assay. The predominant sample type was a combined  
141 nasopharyngeal/throat swab (2640/2673; 98.8%); with lower respiratory tract  
142 samples comprising 33/2,673 (1.2%) of samples (18 sputa, 7 tracheal aspirates, 4  
143 bronchial washes and 4 bronchoalveolar lavage specimens). Overall, 1,129 (42%)  
144 patients were male. The median age of patients was 35 years [interquartile range  
145 (IQR); 28-50 years]. Most samples were collected through the dedicated COVID-19  
146 screening clinic in the Emergency Department (2,002/2,673 samples; 74.9%), with  
147 513/2,673 (19.2%) samples from the dedicated COVID-19 staff testing clinic,  
148 108/2,673 (4%) from other inpatient wards, 30/2,673 (1.1%) from outpatient clinics  
149 and 20/2,673 (0.7%) from the intensive care unit.

150

151 Of the 2,673 patient samples tested, 54 patients were positive for SARS-CoV-2  
152 (0.02%). Of these, 33/54 were male (61%). The median age of PCR-positive  
153 patients was 40 years [IQR 29-51 years]. Forty-one patients (76%) had returned  
154 from international travel in the preceding 14 days, 27 patients (50%) were contacts of  
155 known cases of COVID-19 and 15 patients (28%) had both of these risk factors. Four  
156 patients (7%) were healthcare workers. Four patients (7.4%) required admission to  
157 hospital, however no patients required intensive care unit support. One patient had  
158 no clear epidemiological link (no international travel or known contact with a COVID-  
159 19 case), suggesting possible community transmission. Of the 54 SARS-CoV-2  
160 positive patients, the median time from onset of symptoms to swab collection was 3  
161 days [IQR; 1-5 days] and the median turn-around time from sample collection to  
162 result for SARS-CoV-2 positive results was 13 hours [IQR; 10-21 hours].

163

#### 164 ***Assay performance***

165 All 54 positive samples were sent to the reference laboratory for confirmation, and a  
166 random subset of 621/2,673 negative samples (23%) was also tested at the  
167 reference laboratory. Of the 54 positive results, 53 were positive on at least one  
168 confirmatory assay at VIDRL. Of the 621 randomly selected negative samples that  
169 were sent to the reference laboratory, all were confirmed as negative. Compared to  
170 the reference standard, sensitivity of the Coronavirus Typing assay for SARS-CoV-2  
171 was 100% [95% CI 93.2%-100%], specificity 99.8% [95% CI 99.1%-100%], positive  
172 predictive value 98.1% (95% CI 90.2%-99.7%) and negative predictive value 100%  
173 [95% CI 99.4%-100%].

174



175 Importantly, there was a single discrepant sample that tested positive on the  
176 AusDiagnostics Coronavirus Typing assay, and negative on the RdRP and E gene  
177 assays at VIDRL. This sample had a melt curve at the appropriate temperature on  
178 the AusDiagnostics assay and had a low semi-quantitative concentration of SARS-  
179 CoV-2. Testing of multiple replicates of this sample at VIDRL disclosed a pattern of  
180 results typical of a sample at the limit of detection in the reference assays: positive in  
181 some replicates at high cycle threshold values, and negative in others (data not  
182 shown). This sample was collected 4 days after symptom onset from a patient with  
183 who had recently returned from international travel and had contact with a known  
184 case of COVID-19. Given the public health consequences of reporting a false-  
185 negative result, we elected to report this result as a 'probable low positive result.'

186

187 The comparative results of the quality assessment panel from the reference  
188 laboratory are shown in Supplementary Table 1. All samples were extracted on both  
189 the EZ1 Advanced system and the MT-PREP Extractor System. SARS-CoV-2 was  
190 detected in all 12 gamma-irradiated SARS-CoV-2 spiked samples from a blinded set  
191 of 20 samples using the Coronavirus Typing assay (Supplementary Table 1).

192

193 Other respiratory pathogens were detected in 191/2,673 (7%) samples, with  
194 seasonal coronaviruses accounting for 119/191 (62%) of these infections.

195 Coinfection with SARS-CoV-2 was detected on two occasions, one in combination  
196 with RSV and another with human coronavirus OC43 (Supplementary Table 2).

197

198 A weak inverse correlation was demonstrated between the semi-quantitative  
199 assessment of viral concentration of SARS-CoV-2 using the Coronavirus Typing

200 assay and the time of swab collection after symptom onset ( $r^2 = -0.3357$ ;  $p=0.01$ )  
201 with the highest viral concentrations detected in the first 24-48 hours after symptom  
202 onset (Figure 1).

203

### 204 ***Integration into workflow***

205 The number of samples received for SARS-CoV-2 increased rapidly after the  
206 implementation of testing at RMH, with over 200 samples received per day by the  
207 second week of testing (Figure 2A). We undertook an internal audit assessing the  
208 time of day that specimens arrived in the laboratory; we identified that the majority of  
209 samples arrived in the afternoon and evening, rather than in the morning (Figure 2B).  
210 This information enabled us to rapidly adjust work rosters for our specialist molecular  
211 scientific staff rostering in order to optimize our SARS-CoV-2 testing workflow. This  
212 adjustment allowed the laboratory to consistently achieve turnaround times of less  
213 than 24 hours for coronavirus testing (Figure 2C).

214

### 215 **DISCUSSION**

216 Initial diagnostic testing for SARS-CoV-2 in low prevalence, high resource settings  
217 was focused in public health labs, generally using in-house real-time RT-PCR  
218 assays recommended to the World Health Organization (WHO) <sup>2, 15</sup>. However, as the  
219 COVID-19 pandemic has rapidly evolved, the focus of testing has shifted to  
220 diagnostic testing in clinical microbiology laboratories to enable the delivery of  
221 clinical care <sup>7</sup>. The emergency exemptions instituted by national regulatory bodies  
222 such as the FDA in the US and the TGA in Australia have led to expedited approvals  
223 for in-vitro diagnostic tests to be generated based only on information provided by  
224 the manufacturer and limited external validation (<https://www.tga.gov.au/covid-19->

225 test-kits-included-artg-legal-supply-australia). There is thus an urgent need for robust  
226 clinical validation data to support the use of commercial assays for SARS-CoV-2  
227 testing. Here, we provide validation of a commercially-available assay, and describe  
228 how we integrated testing for SARS-CoV-2 into a busy academic hospital laboratory.  
229

230 Our early experience of testing for SARS-CoV-2 is similar to other early data from  
231 low incidence settings<sup>17, 18</sup>. This initial cohort of patients with COVID-19 was  
232 predominantly returning international travelers; and half had known contact with a  
233 confirmed COVID-19 case. In general, patients were younger than those seen in  
234 higher incidence settings where community transmission has been established<sup>19</sup>.  
235 These findings may be impacted by selection bias, given the Victorian Department of  
236 Health guidelines in place at the time of this study mostly limited testing to those with  
237 epidemiological risk factors for COVID-19. At the beginning of this study, only limited  
238 community transmission had been established in Australia<sup>20</sup>, with the situation  
239 evolving such that on the last date of patient inclusion, 2,799 cases had been  
240 confirmed in Australia, with 547 new cases in the previous 24 hours and 11 total  
241 deaths<sup>21</sup>. Significant public health measures designed to mitigate the clinical,  
242 societal and economic impact of COVID-19 were instituted in a staged manner  
243 during this study period including international travel restrictions and increasing  
244 social distancing measures<sup>22</sup>.

245  
246 Similar to other studies, we describe a correlation between days after symptom  
247 onset and concentration of SARS-CoV-2, with the highest concentrations  
248 demonstrated early after symptom onset,<sup>23-25</sup>. This suggests that SARS-CoV-2 can  
249 be transmitted early in disease, even when symptoms are relatively mild and often

250 prior to patients seeking medical attention and the diagnosis of COVID-19 being  
251 established. This may account for the efficient person-to-person transmission noted  
252 <sup>26</sup>, particularly within families and social gatherings <sup>27, 28</sup>. This finding has significant  
253 implications for infection control and public health measures required to mitigate this  
254 disease.

255

256 Compared to a public health laboratory reference standard, we found that the  
257 Coronavirus Typing assay had high sensitivity, specificity and negative predictive  
258 value, and in our laboratory, was well-suited to medium-throughput testing for SARS-  
259 CoV-2 (100-200 specimens per day). We hypothesize that the single discrepant  
260 result (positive on Coronavirus Typing assay and negative at reference laboratory)  
261 was due to technical differences in the assay design, with the Coronavirus Typing  
262 assay having a hemi-nested design and high number of PCR cycles – it is possible  
263 that these technical differences may result in a lower limit of detection than the public  
264 health laboratory reference standard. In addition, testing on the original referred  
265 swab after RMH diagnostic testing had been performed may have diminished the  
266 quantity of available input material for testing at the reference laboratory.

267

268 In order to accommodate the rapid introduction of a high-impact new test, it was  
269 necessary to undertake considerable changes to the workflow of the laboratory, with  
270 a change in our staffing shift patterns towards late afternoon and evening work.  
271 Similar to many clinical microbiology laboratories, molecular work in our laboratory is  
272 performed by staff with specific skills in molecular biology. However, in order to  
273 accommodate changes in shift pattern (and to ensure a larger pool of staff to perform  
274 testing) we introduced a rapid training program for non-molecular staff. Collectively,

275 these workflow changes enabled us to reduce the turn-around time for producing a  
276 SARS-CoV-2 result, which will be important as the pandemic in Australia evolves  
277 towards clinical care of infected patients.

278

279 Although a limitation of our study is the single-site design, we provide robust  
280 validation data for a testing platform that is widely used across Australia, and has  
281 also been used in the United States and the United Kingdom <sup>29</sup>. In this rapidly  
282 evolving pandemic, where standard regulatory requirements for the introduction of  
283 new assays have been replaced by emergency authorizations in many countries,  
284 including Australia, it is critical that laboratories share their post-market validation  
285 experiences, as the consequences of widespread introduction of a sub-optimal  
286 assay for SARS-CoV-2 are profound.

287

288 COVID-19 has placed unprecedented demands on clinical microbiology laboratories.  
289 In conjunction with the public health units, clinical microbiology laboratories were part  
290 of the first ‘wave’ of response to this pandemic <sup>30</sup>. Subsequent waves will relate to  
291 clinical management, critical care and end of life support for those affected by this  
292 disease <sup>31-33</sup>. In Australia, containment and preparedness measures, particularly  
293 international travel restrictions, allowed time for clinical microbiology laboratories to  
294 review diagnostic assays, develop workflows and implement testing prior to the  
295 surge in demand. Here we share our pragmatic ‘in-field’ experience, and encourage  
296 other laboratories to follow suit.

297

298

299

300 **ACKNOWLEDGEMENTS**

301 We thank staff in the Department of Microbiology at the Royal Melbourne Hospital  
302 and in the Victorian Infectious Diseases Reference Laboratory for technical support.

303

304 **FUNDING**

305 No specific funding was received to conduct this work.

306

307 **CONFLICTS OF INTEREST**

308 All authors: no conflicts.

309

310 **ETHICS**

311 This study was approved as part of routine activities relating to the introduction and  
312 validation of in-vitro diagnostic devices QA2019134. Validation studies are a core  
313 part of laboratory work. This validation study was conducted according to the  
314 guidelines of the National Pathology Accreditation Advisory Council, '*Requirement*  
315 *for quality control, external quality assurance and method evaluation (sixth*  
316 *edition)*<sup>34</sup>.

317

318 All authors had full access to all of the data (including statistical reports and tables)  
319 in the study.

320

321

322

323

324

## 325 REFERENCES

- 326 [1] Zhu N, Zhang D, Wang W, et al. A Novel Coronavirus from Patients with Pneumonia  
327 in China, 2019. *N Engl J Med.* 2020; 382: 727-33.
- 328 [2] Corman VM, Landt O, Kaiser M, et al. Detection of 2019 novel coronavirus (2019-  
329 nCoV) by real-time RT-PCR. *Euro Surveill.* 2020; 25.
- 330 [3] Reusken C, Broberg EK, Haagmans B, et al. Laboratory readiness and response for  
331 novel coronavirus (2019-nCoV) in expert laboratories in 30 EU/EEA countries, January 2020.  
332 *Euro Surveill.* 2020; 25.
- 333 [4] Centers for Disease Control and Prevention. CDC 2019 Novel Coronavirus (2019-  
334 nCoV) Real-Time RT-PCR Diagnostic Panel. Atlanta: Centers for Disease Control and  
335 Prevention, 2020.
- 336 [5] Chu DKW, Pan Y, Cheng SMS, et al. Molecular Diagnosis of a Novel Coronavirus  
337 (2019-nCoV) Causing an Outbreak of Pneumonia. *Clin Chem.* 2020.
- 338 [6] Pfeifferle S, Reucher S, Norz D, et al. Evaluation of a quantitative RT-PCR assay for the  
339 detection of the emerging coronavirus SARS-CoV-2 using a high throughput system. *Euro*  
340 *Surveill.* 2020; 25.
- 341 [7] Sharfstein JM, Becker SJ, Mello MM. Diagnostic Testing for the Novel Coronavirus.  
342 *JAMA.* 2020.
- 343 [8] *Therapeutic Goods (Medical Devices—Novel Coronavirus) (Emergency) Exemption*  
344 *2020.* (Cth)
- 345 [9] *Therapeutic Goods (Medical Devices - Accredited Pathology Laboratories (COVID-19*  
346 *Emergency) Exemption 2020.* (Cth)
- 347 [10] Australian Government Department of Health: Therapeutic Goods Administration.  
348 COVID-19 test kits included on the ARTG for legal supply in Australia. Canberra: Australian

- 349 Government Department of Health, 2020. [https://www.tga.gov.au/covid-19-test-kits-](https://www.tga.gov.au/covid-19-test-kits-included-artg-legal-supply-australia)  
350 [included-artg-legal-supply-australia](https://www.tga.gov.au/covid-19-test-kits-included-artg-legal-supply-australia). Accessed 12<sup>th</sup> April, 2020.
- 351 [11] Konrad R, Eberle U, Dangel A, et al. Rapid establishment of laboratory diagnostics for  
352 the novel coronavirus SARS-CoV-2 in Bavaria, Germany, February 2020. *Euro Surveill.* 2020;  
353 25.
- 354 [12] Rojek A DM, Camilleri D, Marshall C, Buising K, Walsham N, Putland M. Early clinical  
355 response to a high consequence infectious disease outbreak at the Royal Melbourne  
356 Hospital Emergency Department - insights from COVID-19. *Med J Aust.* 2020.
- 357 [13] Victorian Department of Health and Human Services. Coronavirus disease 2019  
358 (COVID-19): case and contact management guidelines for health services and general  
359 practitioners. Version 15. 2020.
- 360 [14] National Pathology Accreditation Advisory Council. Requirements for the  
361 development and use of in-house in vitro diagnostic medical devices (IVDs) (Fourth Edition).  
362 Canberra: Australian Government Department of Health, 2018.
- 363 [15] Public Health Laboratory Network. PHLN guidance on laboratory testing for SARS-  
364 CoV-2 (the virus that causes COVID-19). Public Health Laboratory Network, 2020.
- 365 [16] Caly L DJ, Roberts J, Bond K, Tran T, KostECKI R, Yoga Y, Naughton W, Tairaoa G,  
366 Seemann T, Schultz MB, Howden BP, Korman TM, Lewin SR, Williamson DA, Catton M.  
367 Isolation and rapid sharing of the 2019 novel coronavirus (SARS-CoV-2) from the first  
368 diagnosis of COVID-19 in Australia. *Med J Aust.* 2020.
- 369 [17] Ng Y, Li Z, Chua YX, et al. Evaluation of the Effectiveness of Surveillance and  
370 Containment Measures for the First 100 Patients with COVID-19 in Singapore - January 2-  
371 February 29, 2020. *MMWR.* 2020; 69: 307-11.



- 372 [18] Spiteri G, Fielding J, Diercke M, et al. First cases of coronavirus disease 2019 (COVID-  
373 19) in the WHO European Region, 24 January to 21 February 2020. *Euro Surveill.* 2020; 25.
- 374 [19] Onder G, Rezza G, Brusaferro S. Case-Fatality Rate and Characteristics of Patients  
375 Dying in Relation to COVID-19 in Italy. *JAMA.* 2020.
- 376 [20] World Health Organization. Coronavirus disease 2019 (COVID-19) Situation Report -  
377 42, 2nd March 2020. Geneva: World Health Organization.
- 378 [21] World Health Organization. Coronavirus disease 2019 (COVID-19) Situation Report -  
379 66, 26 March 2020. Geneva: World Health Organization.
- 380 [22] Australian Government Department of Health. Government response to the COVID-  
381 19 outbreak. Canberra, 2020. [https://www.health.gov.au/news/health-alerts/novel-](https://www.health.gov.au/news/health-alerts/novel-coronavirus-2019-ncov-health-alert/government-response-to-the-covid-19-outbreak)  
382 [coronavirus-2019-ncov-health-alert/government-response-to-the-covid-19-outbreak.](https://www.health.gov.au/news/health-alerts/novel-coronavirus-2019-ncov-health-alert/government-response-to-the-covid-19-outbreak)  
383 Accessed 12<sup>th</sup> April, 2020.
- 384 [23] To KK, Tsang OT, Leung WS, et al. Temporal profiles of viral load in posterior  
385 oropharyngeal saliva samples and serum antibody responses during infection by SARS-CoV-  
386 2: an observational cohort study. *Lancet Infect Dis.* 2020.
- 387 [24] Kim JY, Ko JH, Kim Y, et al. Viral Load Kinetics of SARS-CoV-2 Infection in First Two  
388 Patients in Korea. *J Korean Medl Sci.* 2020; 35: e86.
- 389 [25] Zou L, Ruan F, Huang M, et al. SARS-CoV-2 Viral Load in Upper Respiratory Specimens  
390 of Infected Patients. *N Engl J Med.* 2020; 382: 1177-79.
- 391 [26] Li Q, Guan X, Wu P, et al. Early Transmission Dynamics in Wuhan, China, of Novel  
392 Coronavirus–Infected Pneumonia. *N Eng J Med.* 2020; 382: 1199-207.
- 393 [27] Pung R, Chiew CJ, Young BE, et al. Investigation of three clusters of COVID-19 in  
394 Singapore: implications for surveillance and response measures. *Lancet.* 2020; 395: 1039-46.

- 395 [28] Chan JF-W, Yuan S, Kok K-H, et al. A familial cluster of pneumonia associated with  
396 the 2019 novel coronavirus indicating person-to-person transmission: a study of a family  
397 cluster. *Lancet*. 2020; 395: 514-23.
- 398 [29] Meunier D, Woodford N, Hopkins KL. Evaluation of the AusDiagnostics MT CRE EU  
399 assay for the detection of carbapenemase genes and transferable colistin resistance  
400 determinants mcr-1/-2 in MDR Gram-negative bacteria. *J Antimicrob Chemother*. 2018; 73:  
401 3355-58.
- 402 [30] Binnicker MJ. Emergence of a Novel Coronavirus Disease (COVID-19) and the  
403 Importance of Diagnostic Testing: Why Partnership between Clinical Laboratories, Public  
404 Health Agencies, and Industry Is Essential to Control the Outbreak. *Clin Chem*. 2020.
- 405 [31] Poston JT, Patel BK, Davis AM. Management of Critically Ill Adults With COVID-19.  
406 *JAMA* 2020.
- 407 [32] Murthy S, Gomersall CD, Fowler RA. Care for Critically Ill Patients With COVID-19.  
408 *JAMA*. 2020.
- 409 [33] Curtis JR, Kross EK, Stapleton RD. The Importance of Addressing Advance Care  
410 Planning and Decisions About Do-Not-Resuscitate Orders During Novel Coronavirus 2019  
411 (COVID-19). *JAMA*. 2020.
- 412 [34] National Pathology Accreditation Advisory Council. Requirements for Quality  
413 Control, External Quality Assurance and Method Evaluation (Sixth edition 2018). *Canberra:*  
414 *Australian Government Department of Health*; 2018.
- 415
- 416
- 417
- 418

419 **TABLE**

420 **Table 1.** Viral targets present in the AusDiagnostics Coronavirus Typing Assay

| <b>Virus assay</b> | <b>Genetic Target of RT-PCR Sequence</b> |
|--------------------|------------------------------------------|
| HCoV-HKU1          | Nucleocapsid                             |
| HCoV-OC43          | Nucleocapsid                             |
| HCoV-229E          | Membrane protein                         |
| HCoV-NL63          | Membrane protein                         |
| MERS-CoV           | Orf1ab                                   |
| SARS-CoV           | Orf1ab                                   |
| SARS-CoV-2         | Orf1ab                                   |

421 Abbreviations: CoV, coronavirus; HCoV, human coronavirus; MERS, Middle Eastern  
422 respiratory syndrome; Orf, open reading frame; SARS, Severe acute respiratory  
423 syndrome.

424

425

426

427

428

429

430

431

432

433

434

435 **FIGURE LEGENDS**

436 **Figure 1.** Box-plot of Coronavirus Typing assay semi-quantitative concentration  
437 value relative to the date a nasopharyngeal/throat swab was taken for SARS-CoV-2  
438 after symptom onset. The solid line represents the median and the whiskers  
439 represent the interquartile range

440 **Figure 2:** A) Number of SARS-CoV-2 tests performed using the Coronavirus Typing  
441 assay per day; B) Number of samples received by hour of the day for SARS-CoV-2  
442 during the study period; C) Median turnaround time for SARS-CoV-2 testing from  
443 sample collection to result availability per day

### Figure 1. Correlation between semi-quantitative assessment of viral concentration of SARS-CoV-2 and time of swab collection after symptom onset

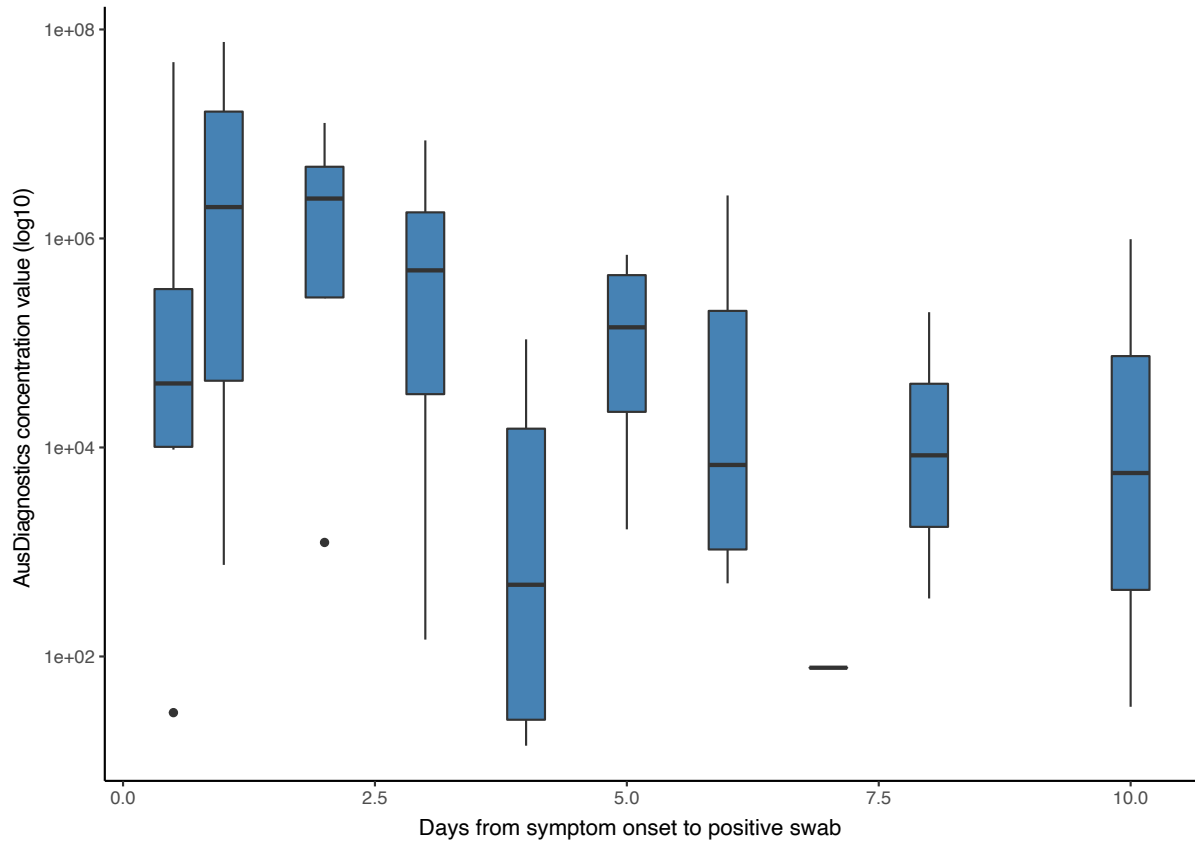

**Figure 1 Legend.** Box-plot of Coronavirus Typing assay semi-quantitative concentration value relative to the date a nasopharyngeal/throat swab was taken for SARS-CoV-2 after symptom onset. The solid line represent the median and the whiskers represent the interquartile range

medRxiv preprint doi: <https://doi.org/10.1101/2020.06.03.20117267>; this version posted June 5, 2020. The copyright holder for this preprint (which was not certified by peer review) is the author/funder, who has granted medRxiv a license to display the preprint in perpetuity. All rights reserved. No reuse allowed without permission.

**Figure 2. Characteristics of samples received for SARS-CoV-2 testing during the validation study period.**

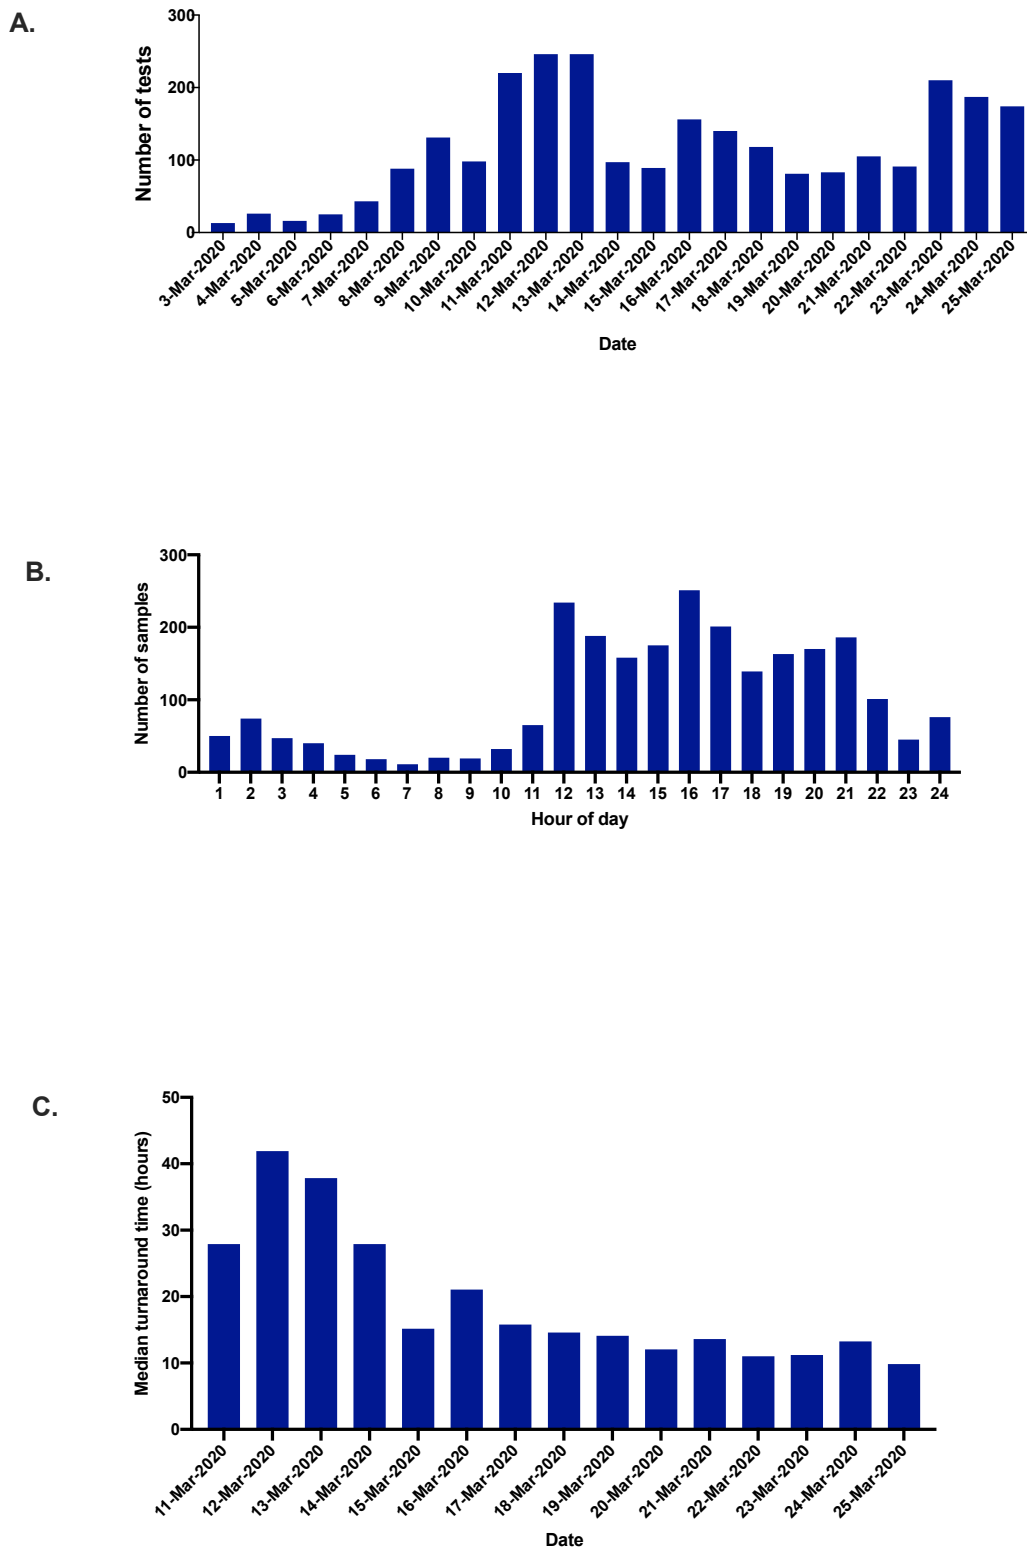

**Figure 2 Legend.** A) Number of SARS-CoV-2 tests performed using the Coronavirus Typing assay per day; B) Number of samples received by hour of the day for SARS-CoV-2 during the study period; C) Median turnaround time for SARS-CoV-2 testing from sample collection to result availability per day
